# Supplementary material
Source: PubMed Central journal article supplement (PMC3697500)
Supplement: AEM.00973-13_zam999104544so1.pdf [file AEM.00973-13_zam999104544so1.pdf]

## SUPPLEMENTAL INFORMATION

### Engineering of *Ralstonia eutropha* H16 for Autotrophic and Heterotrophic Production of Methyl Ketones

Jana Müller<sup>1</sup>, Daniel MacEachran<sup>3</sup>, Helcio Burd<sup>1</sup>, Noppadon Sathitsuksanoh<sup>1</sup>, Changhao Bi<sup>1</sup>, Yi-Chun Yeh<sup>1</sup>, Taek Soon Lee<sup>1</sup>, Nathan J. Hillson<sup>1</sup>, Swapnil R. Chhabra<sup>1</sup>,  
Steven W. Singer<sup>2</sup> and Harry R. Beller<sup>2\*</sup>

<sup>1</sup>Physical Biosciences Division and <sup>2</sup>Earth Sciences Division

Lawrence Berkeley National Laboratory, Berkeley, California 94720

<sup>3</sup>Logos Technologies, Fairfax, Virginia 22031, United States

**\*Corresponding author:**

Harry R. Beller  
Lawrence Berkeley National Laboratory  
1 Cyclotron Road, MS 70A 3317  
Berkeley, CA 94720

E-mail: [HRBeller@lbl.gov](mailto:HRBeller@lbl.gov)

Phone: (510) 486-7321

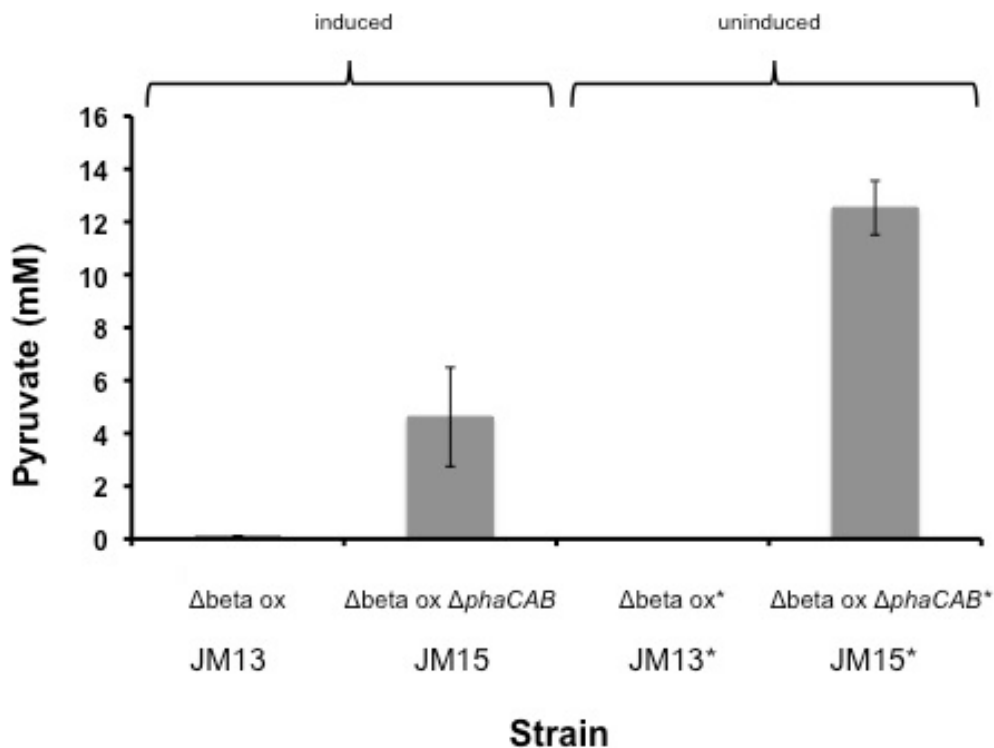

**FIGURE S1.** Pyruvate excreted into culture medium by *R. eutropha* mutant strains bearing the methyl ketone pathway under induced and uninduced heterotrophic conditions (mutants with  $\beta$ -oxidation and/or *phaCAB* chromosomal deletions; Table 1). Bar heights represent the average of at least three independent biological replicates and error bars represent one standard deviation at 96 h post-induction.

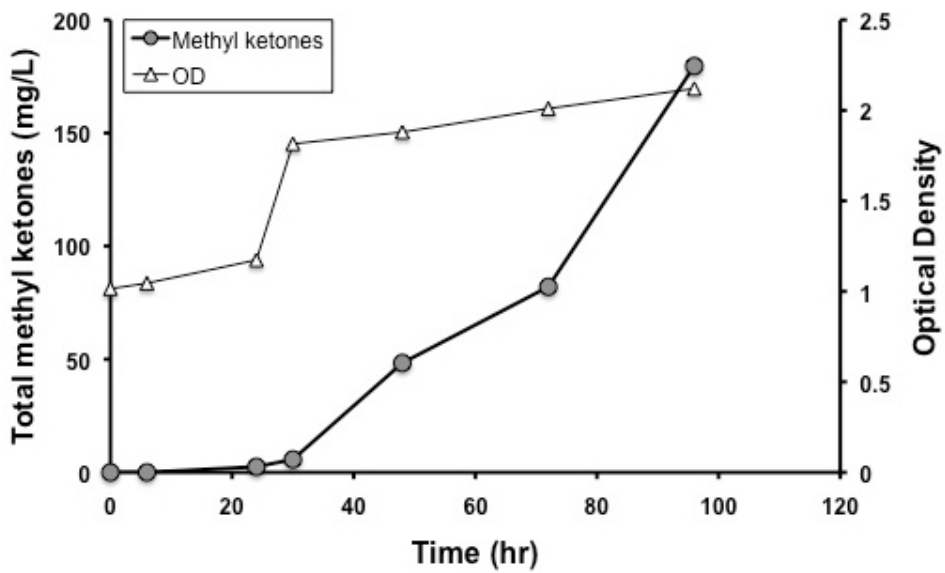

**FIGURE S2.** Autotrophic methyl ketone production in *R. eutropha* strain JM13 ( $\beta$ -oxidation mutant) under a  $\text{H}_2:\text{O}_2:\text{CO}_2$  atmosphere (80:4:16).

**TABLE S1.** Primers used in this study

| Primer name                    | Target                | Primer Sequence (5' – 3') <sup>a</sup>                   |
|--------------------------------|-----------------------|----------------------------------------------------------|
| pha KO up fw_BamHI             | H16<br>A1437-<br>1439 | <u>ACTGCAGGATCCCGACGCCGGTCGTTCTACTC</u><br>CTAT          |
| pha KO up rv                   | H16<br>A1437-<br>1439 | <u>CTCATGCACTTGGTTCCGAGGTTTGCCGGTCGC</u><br>CATGATTT     |
| pha KO down fw                 | H16<br>A1437-<br>1439 | <u>CCTCGGAACCAAGTGCATGAGCTCAACGGCGG</u><br>CCTGCATAT     |
| pha KO down rv_BamHI           | H16<br>A1437-<br>1439 | <u>ACTGCAGGATCC</u> TTTCCAGGTAGGTGCCCATC                 |
| phaC1AB1_check_fw              | H16<br>A1437-<br>1439 | AAGTGCGCGATGCCTTCCTG                                     |
| phaC1AB1_check_rv              | H16<br>A1437-<br>1439 | ATCATGCCCTGCATCATCGG                                     |
| fadE_A0460 KO up<br>fw_BamHI   | H16<br>A0460          | <u>ACTGCAGGATCCCCAGTCAGCCCGTCTCGAAT</u>                  |
| fadE_A0460 KO up rv            | H16<br>A0460          | <u>CGTTCGGAGTCGAAGAAGCCCGTACTGGCCCA</u><br>TCTGAGACT     |
| fadE_A0460 KO down fw          | H16<br>A0460          | <u>GGGCTTCTTCGACTCCGAACGTTCTGAGTCGAC</u><br>TCTACCCGTC   |
| fadE_A0460 KO down<br>rv_BamHI | H16<br>A0460          | <u>ACTGCAGGATCCCGATGAAGTTGGGCGTGTCC</u>                  |
| fadE_A0460 KO check_fw         | H16<br>A0460          | CGGTTTCGGCCGCAAGCAAATA                                   |
| fadE_A0460 KO check_rv         | H16<br>A0460          | ACGTCGAACGGGATGCCGAA                                     |
| fadE_A1530 KO up<br>fw_BamHI   | H16<br>A1530          | <u>ACTGCAGGATCCATCGCCGTGGGCCACCCCTA</u>                  |
| fadE_A1530KO up rv             | H16<br>A1530          | <u>GAGCTAGAGCGGGGCTGTTGACTCGCGGCGGG</u><br>ATAGGATCAT    |
| fadE_A1530 KO<br>down fw       | H16<br>A1530          | <u>GTCAACAGCCCCGCTCTAGCTCTGAGCGGCGC</u><br>TTGCCATCCCCGA |
| fadE_A1530 KO down<br>rv_BamHI | H16<br>A1530          | <u>ACTGCAGGATCCTCGTCGCCAGGCGGTGCAG</u>                   |
| fadE_A1530 KO check_fw_2       | H16<br>A1530          | GGCCTGAAGGTCGACGACAT                                     |

---

|                                |                |                                                     |
|--------------------------------|----------------|-----------------------------------------------------|
| fadE_A1530 KO check_rv_2       | H16            | CCAGGATCTGGCCGGTGATG                                |
| ltesA_fw                       | A1530<br>'tesA | TGTGGAATTGTGAGCGGATA                                |
| ltesA_rv_BamHI                 | 'tesA          | ACTGCAGGATCCGGCGAATTGGAGCTCTTATG                    |
| pJM_pBAD_backbone_fw<br>_NheI  | pJM9           | CAGACTGCAGCTAGCGGATCCAAACTCGAGTA<br>AGG             |
| pJM_pBAD_backbone_rv<br>_EcoRI | pJM9           | ACTGCAGAATTCCCAAAAAACGGGTATGGAG                     |
| pEG530_for_RBS_EcoRI           | pEG530<br>[5]  | ACTGCAGAATTCAAAGGAGGCCATCCTATGGC<br>GGACACGTTATTGAT |
| fadM_rev_NheI                  | pEG530<br>[5]  | CAGACTGCAGCTAGCCTCGAGTTACTTAACCAT<br>CTGC           |

---

<sup>a</sup> restriction sites and tags are underlined
